# Supplementary material for: Multimerized self-assembled caged two-in-one siRNA nanoparticles for photomodulation of RNAi-induced gene silencing
Source: PubMed Central journal article supplement — Chem Sci. 2020 Oct 12;11(45):12289–97. doi: 10.1039/d0sc03562a (PMC8162473; doi:10.1039/d0sc03562a), 2020-10-12
Supplement: SC-011-D0SC03562A-s001.pdf [file SC-011-D0SC03562A-s001.pdf]

## SUPPLEMENTARY INFORMATION

### **Multimerized Self-assembled Caged *Two-in-One* siRNA Nanoparticles for Photomodulation of RNAi-Induced Gene Silencing**

Changmai Chen<sup>[a, b]</sup>, Nannan Jing<sup>[b]</sup>, Zhongyu Wang<sup>[b]</sup>, Yu Zhang<sup>[b]</sup>, Wei Chen<sup>[a]</sup> and Xinjing Tang<sup>\*[b]</sup>

<sup>[a]</sup> School of Pharmacy, Fujian Medical University, Fuzhou 350122, China

<sup>[b]</sup> State Key Laboratory of Natural and Biomimetic Drugs, School of Pharmaceutical Sciences, Peking University, Beijing 100191, China

\* Correspondence

Prof. Dr. Xinjing Tang,

State Key Laboratory of Natural and Biomimetic Drugs, School of Pharmaceutical Sciences, Peking University, Beijing 100191, China.

Tel: +86-010-82805635

Email: xinjingt@hsc.pku.edu.cn

**Table S1.** The sequences of native and chemical-modified oligonucleotides used in this study

| Target | Name                                          | Sequence (5')                                                          | Calc. | Meas.  |
|--------|-----------------------------------------------|------------------------------------------------------------------------|-------|--------|
| GFP    | SG                                            | GAA CGG CAU CAA GGU GAA CTT                                            | 6755  | 6756.7 |
|        | AG                                            | GUU CAC CUU GAU GCC GUU CTT                                            | 6561  | 6562.2 |
|        | Chol- <i>p</i> -SG- <i>p</i> -SS              | Chol- <i>p</i> -GAA CGG CAU CAA GGU GAA CTT- <i>p</i> -SS              | 8326  | 8327.0 |
|        | Chol- <i>p</i> -AG- <i>p</i> -SS              | Chol- <i>p</i> -GUU CAC CUU GAU GCC GUU CTT- <i>p</i> -SS              | 8131  | 8131.5 |
|        | Chol- <i>p</i> -SG- <i>p</i> -NH <sub>2</sub> | Chol- <i>p</i> -GAA CGG CAU CAA GGU GAA CTT- <i>p</i> -NH <sub>2</sub> | 7903  | 7904.8 |
|        | Chol- <i>p</i> -AG- <i>p</i> -NH <sub>2</sub> | Chol- <i>p</i> -GUU CAC CUU GAU GCC GUU CTT- <i>p</i> -NH <sub>2</sub> | 7708  | 7709.5 |
| Eg5    | SE                                            | CAA CAA GGA UGA AGU CUA UTT                                            | 6701  | 6701.6 |
|        | AE                                            | AUA GAC UUC AUC CUU GUU GTT                                            | 6568  | 6570.3 |
|        | Chol- <i>p</i> -SE- <i>p</i> -SS              | Chol- <i>p</i> -CAA CAA GGA UGA AGU CUA UTT- <i>p</i> -SS              | 8271  | 8274.4 |
|        | Chol- <i>p</i> -AE- <i>p</i> -SS              | Chol- <i>p</i> -AUA GAC UUC AUC CUU GUU GTT- <i>p</i> -SS              | 8139  | 8140.9 |

S, sense strand RNA; A, antisense strand RNA; G, GFP; E, Eg5; Chol, cholesterol; *p*, photolinker; SS, thiol modifier C6 S-S; NH<sub>2</sub>, 3'-Amino-Modifier C7

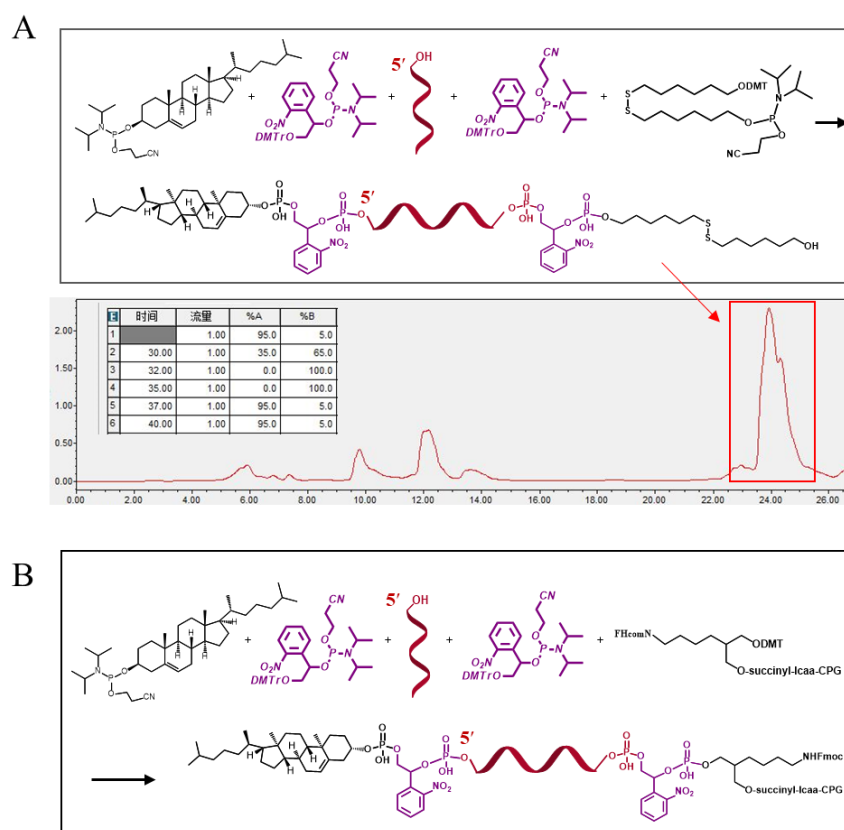**Figure S1.** Synthesis and HPLC purification of thiol-modified caged oligonucleotides with 5' terminal cholesterol modification (A) and amine-modified caged oligonucleotides with 5' terminal cholesterol modification (B).

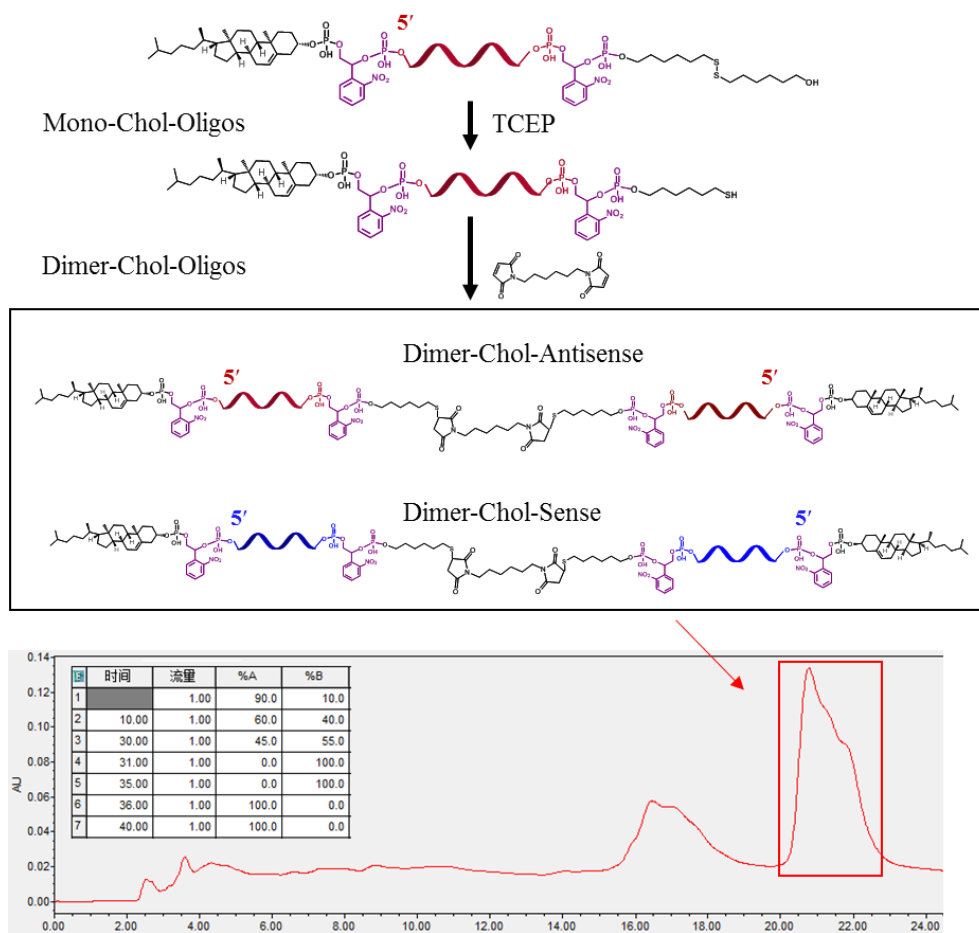

**Figure S2.** Synthesis and HPLC purification of single-strand caged sense dimer (Dimer-Chol-Sense) and caged antisense dimer (Dimer-Chol-Antisense) with cholesterol modification.

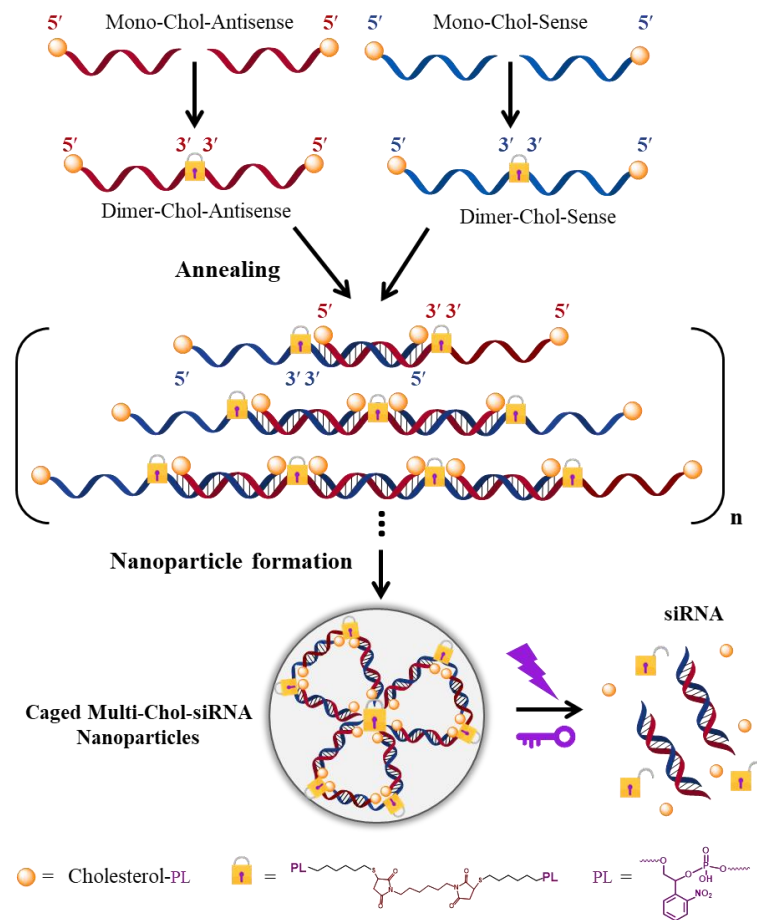

**Figure S3.** Rational design and synthesis of caged Multi-Chol-siRNA self-assembled nanoparticles

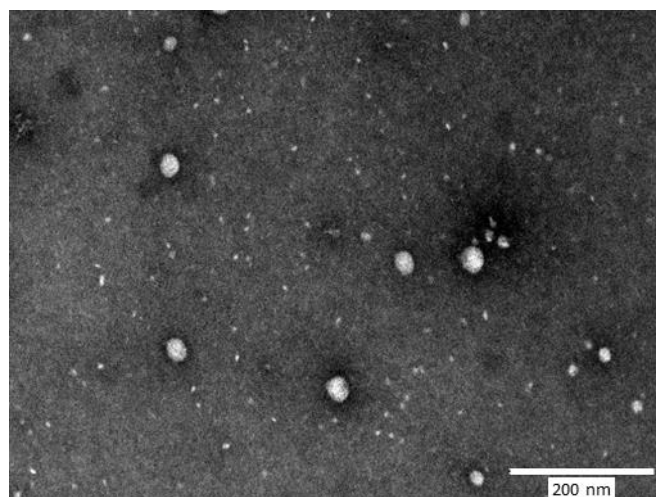

**Figure S4.** TEM image of caged Multi-Chol-siRNA self-assembled nanoparticles upon UV light irradiation

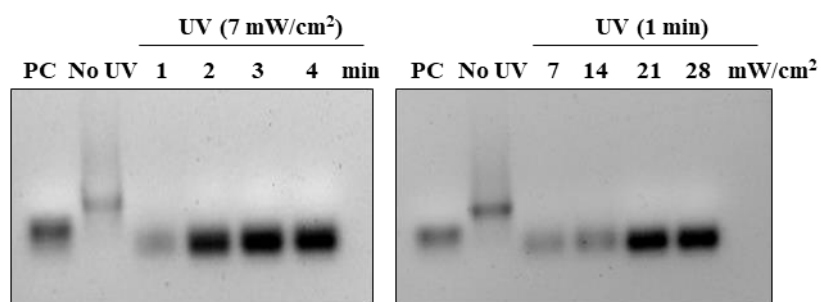

**Figure S5.** Gel-shift assay for evaluation of photosensitivity of Multi-Chol-siRNA self-assembled nanoparticles before or after UV light irradiation

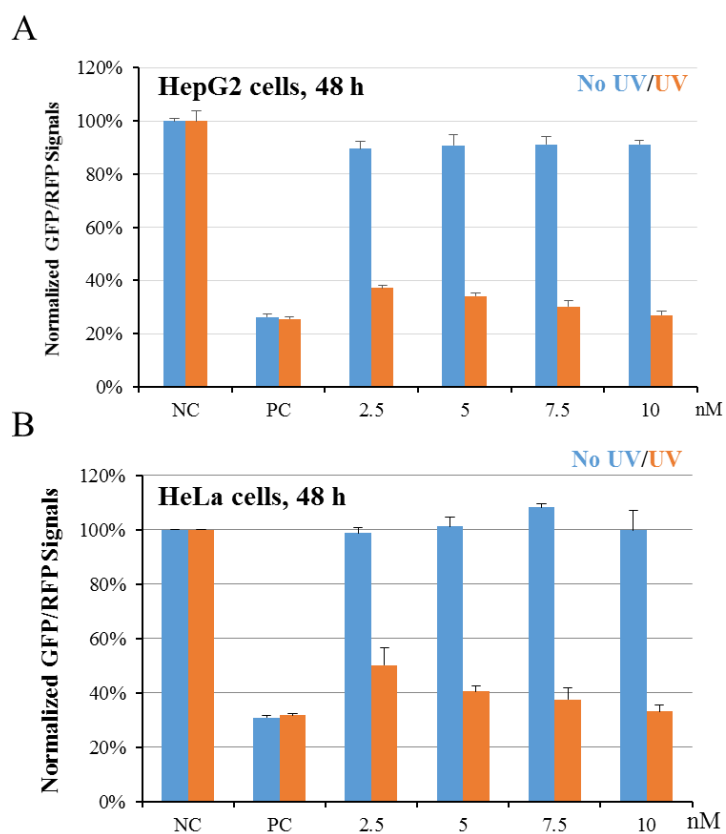

**Figure S6.** Photochemical regulation of GFP gene expression with caged Multi-Chol-siGFP self-assembled nanoparticles in HepG2 cells (A) and HeLa cells (B) for 48 h incubation quantitated by flow cytometry.

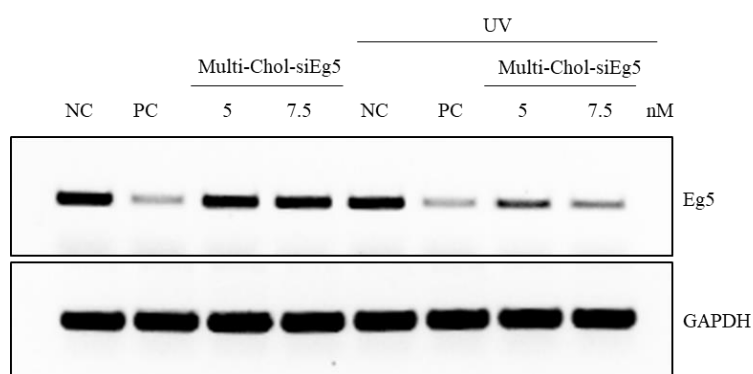

**Figure S7.** Photochemical regulation of Eg5 mRNA levels using caged Multi-Chol-siEg5 self-assembled nanoparticles determined by RT-PCR.

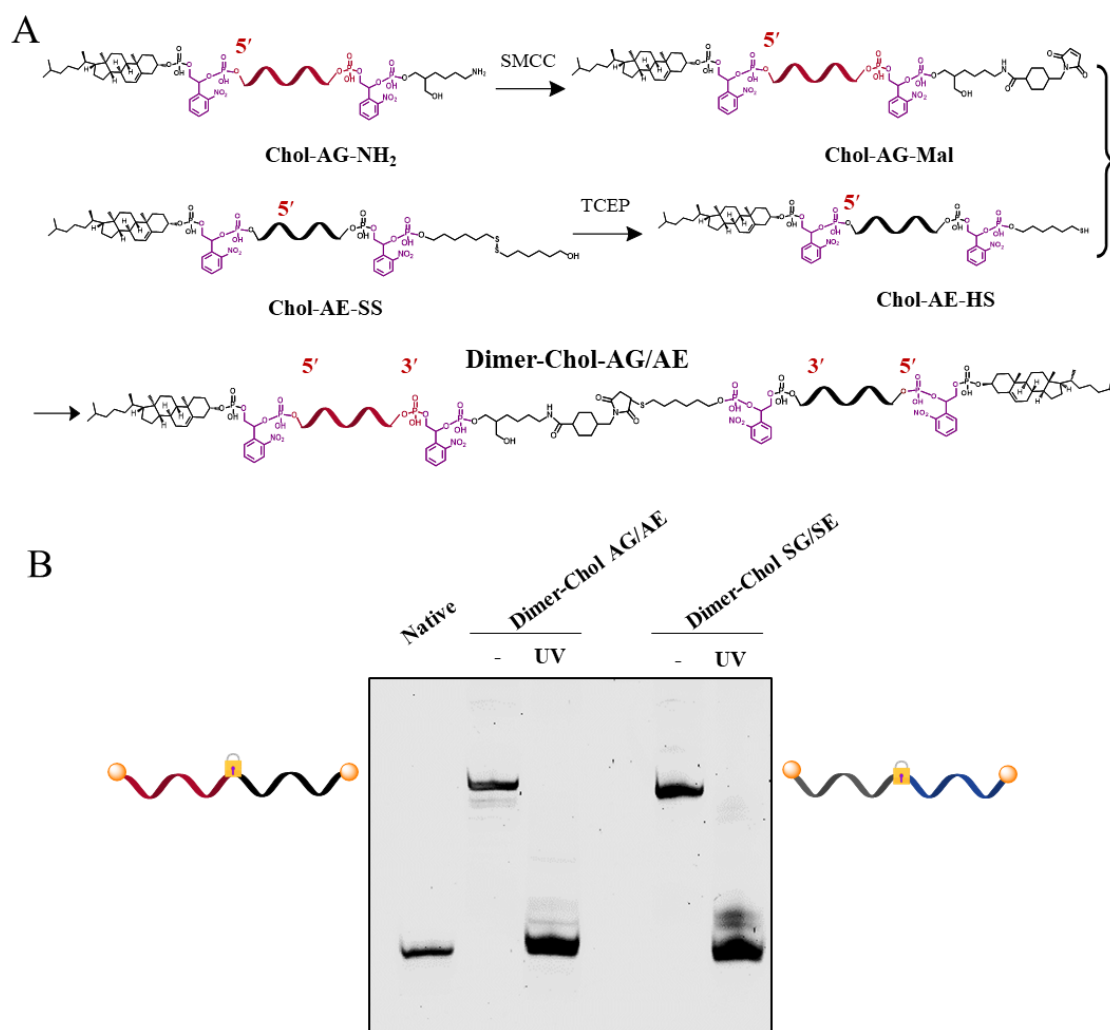

**Figure S8.** Synthesis of single-strand caged antisense Dimer-Chol-AG/AE (or caged sense Dimer-Chol-SG/SE) with 5' end cholesterol modification (A). Dimerization and photorelease ability of caged Dimer-Chol-AG/AE and Dimer-Chol-SG/SE in PAGE gels (B).

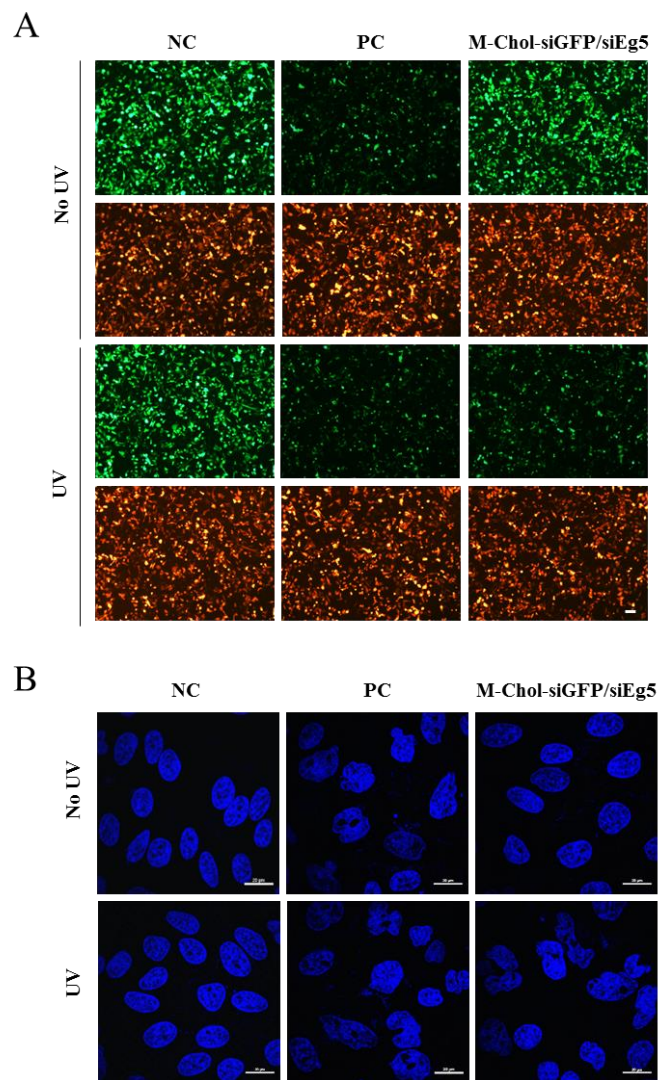

**Figure S9.** Photochemical regulation of GFP gene expression with *Two-in-One* caged Multi-Chol-siGFP/siEg5 self-assembled nanoparticles in HepG2 cells for 48 h incubation (A). Identifying nuclei phenotypes of HepG2 cells with *Two-in-One* caged Multi-Chol-siGFP/siEg5 nanoparticles using confocal laser scanning microscope (B).

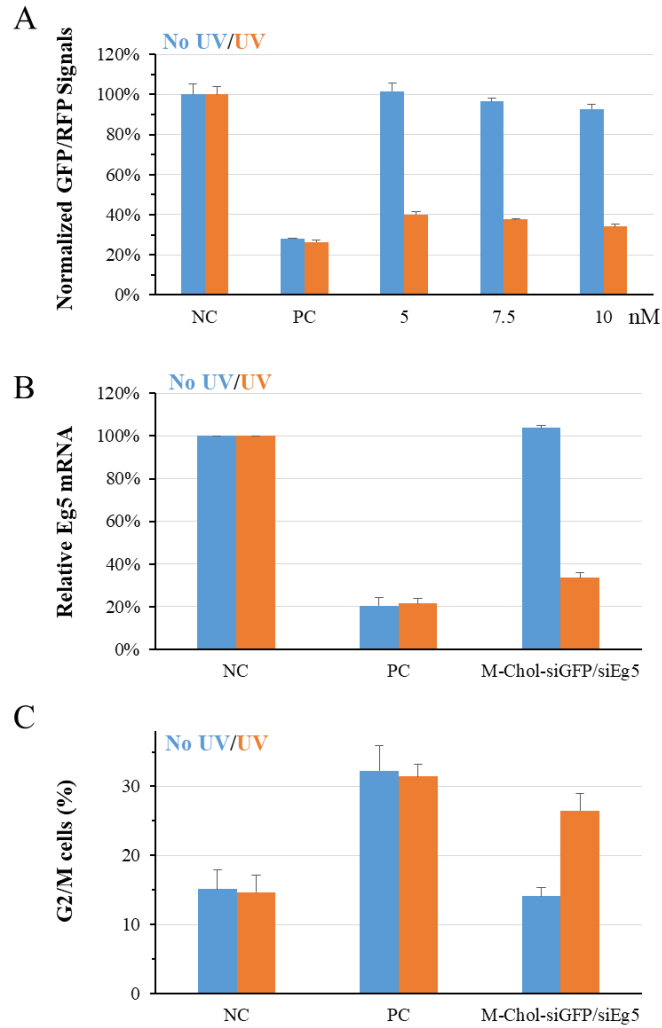

**Figure S10.** Simultaneous gene silencing activities of both GFP and Eg5 genes using *Two-in-One* caged Multi-Chol-siGFP/siEg5 self-assembled nanoparticles. (A) The photochemical regulation of GFP gene expression in HepG2 cells for 48 h incubation quantitated by flow cytometry. (B) Photochemical regulation of Eg5 mRNA levels determined by real time-qPCR using *Two-in-One* caged Multi-Chol-siGFP/siEg5 nanoparticles (7.5 nM siEg5 and 7.5 nM siGFP in nanoparticles). (C) Percentage of cells in G2/M phases of cell cycle. Data are presented as mean  $\pm$  S.E.M. (n=3)



## <sup>1</sup>H NMR and <sup>31</sup>P NMR spectras of cholesterol phosphoramidite

The phosphoramidites of cholesterol (Chol) was synthesized according to our previous work confirmed by NMR.<sup>(1)</sup> <sup>1</sup>H NMR (400 MHz, Chloroform-d) δ 5.34 (dd, J = 12.7, 4.7 Hz, 1H), 3.89-3.74 (m, 2H), 3.62 (tdd, J = 13.7, 8.6, 5.6 Hz, 3H), 2.64 (td, J = 6.7, 1.8 Hz, 2H), 2.04-1.91 (m, 2H), 1.88-1.78 (m, 3H), 0.91 (d, J = 6.5 Hz, 4H), 0.86 (dd, J = 6.7, 1.7 Hz, 6H), 0.67 (s, 3H). <sup>31</sup>P NMR (162 MHz, CDCl<sub>3</sub>) δ 145.59, 145.53, 145.47, 145.42, 145.36, 145.30.

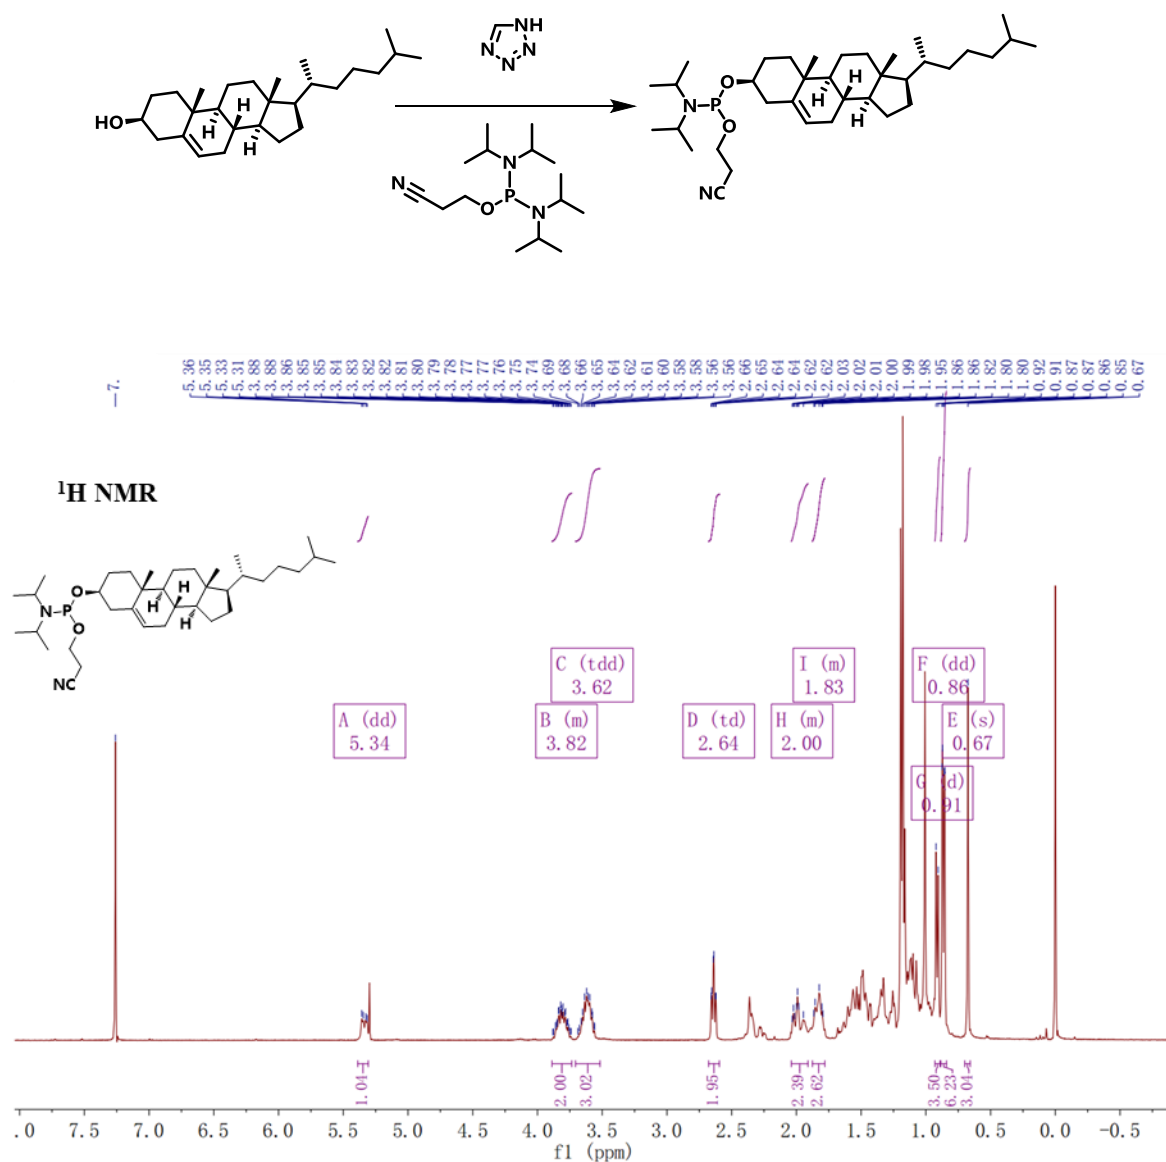



## ESI-MS of chemically modified RNA oligonucleotides

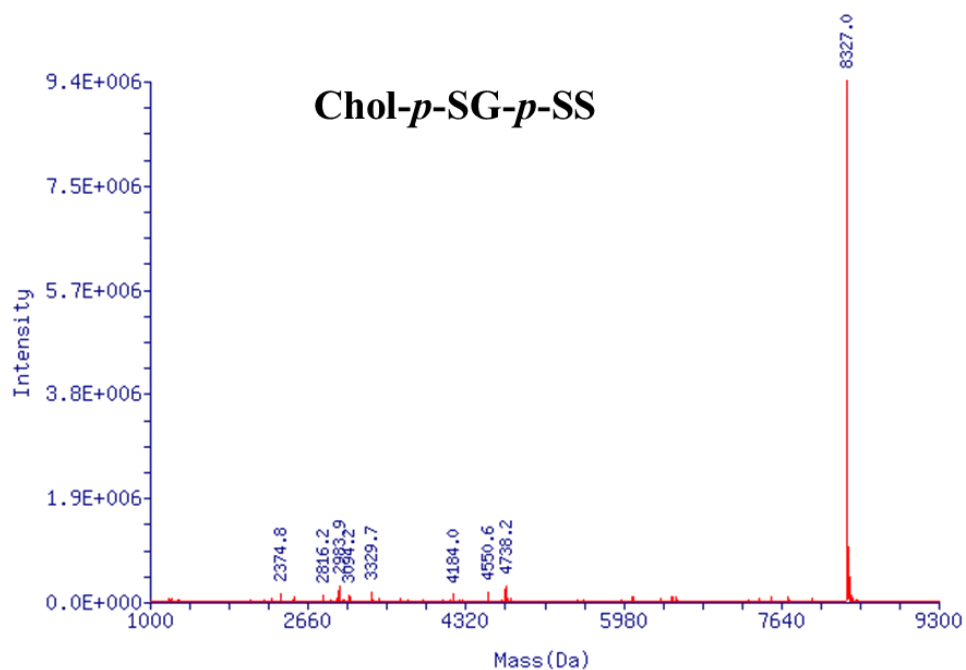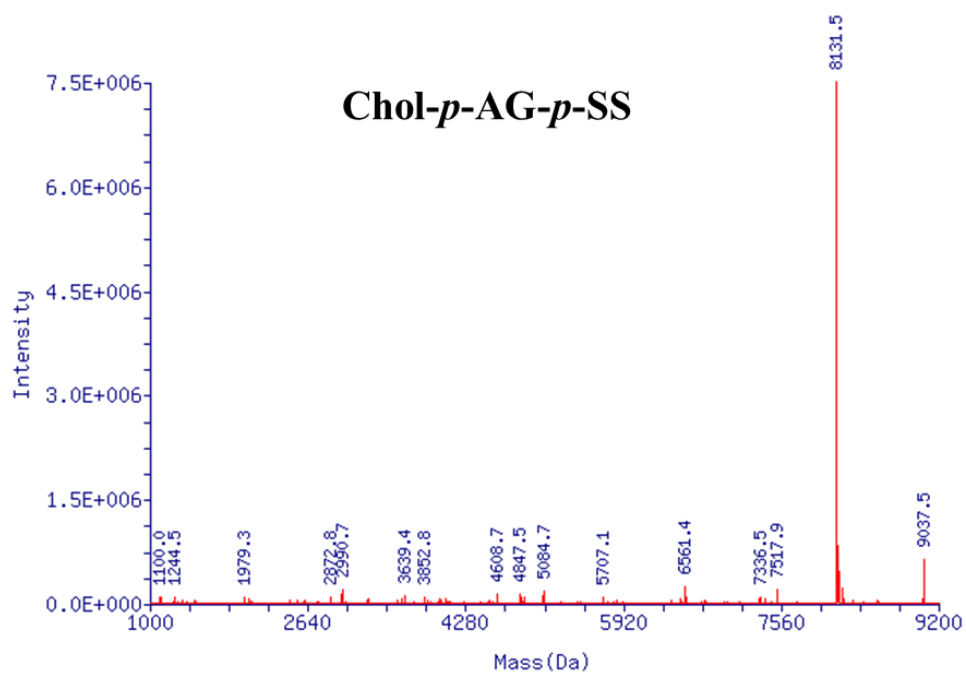

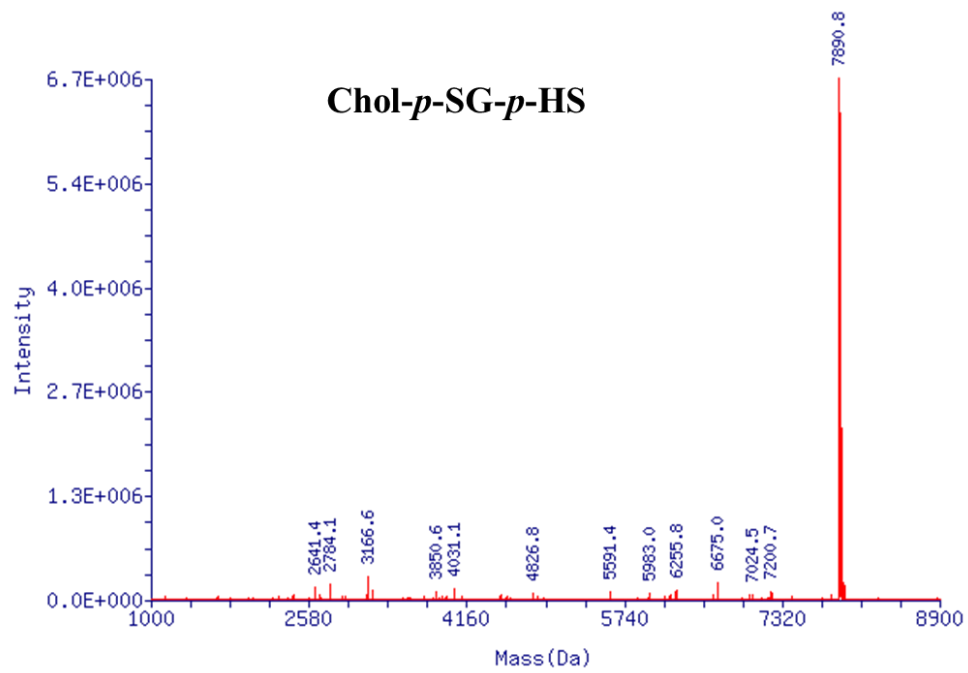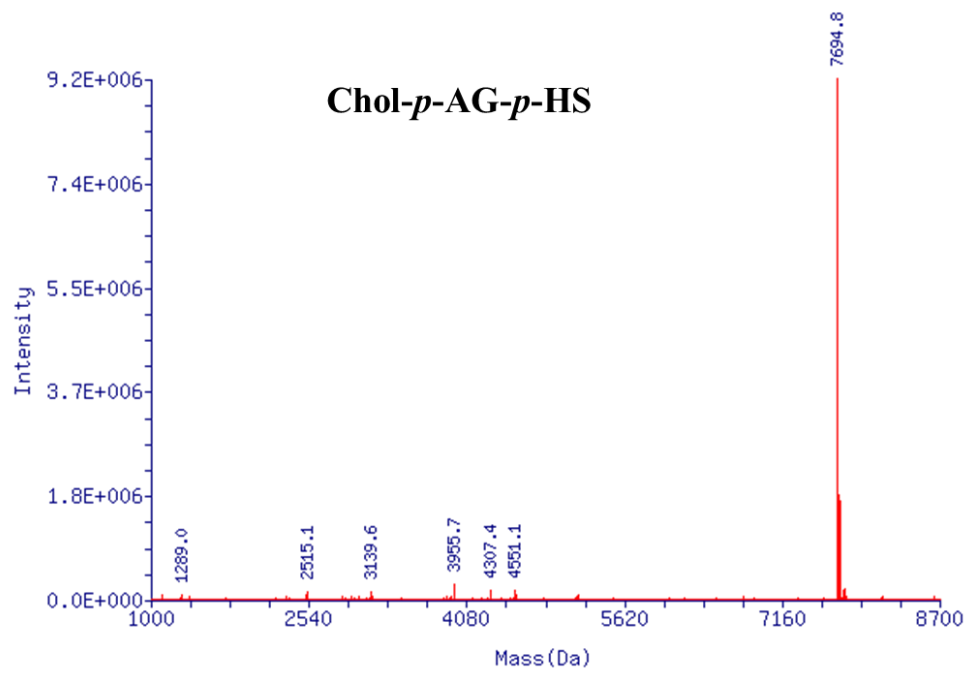

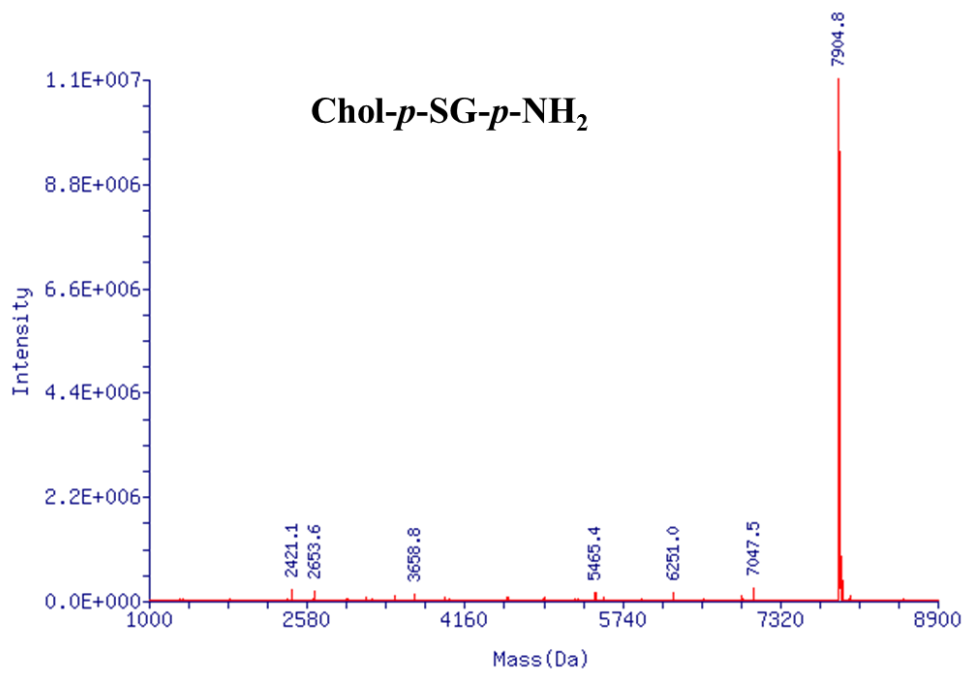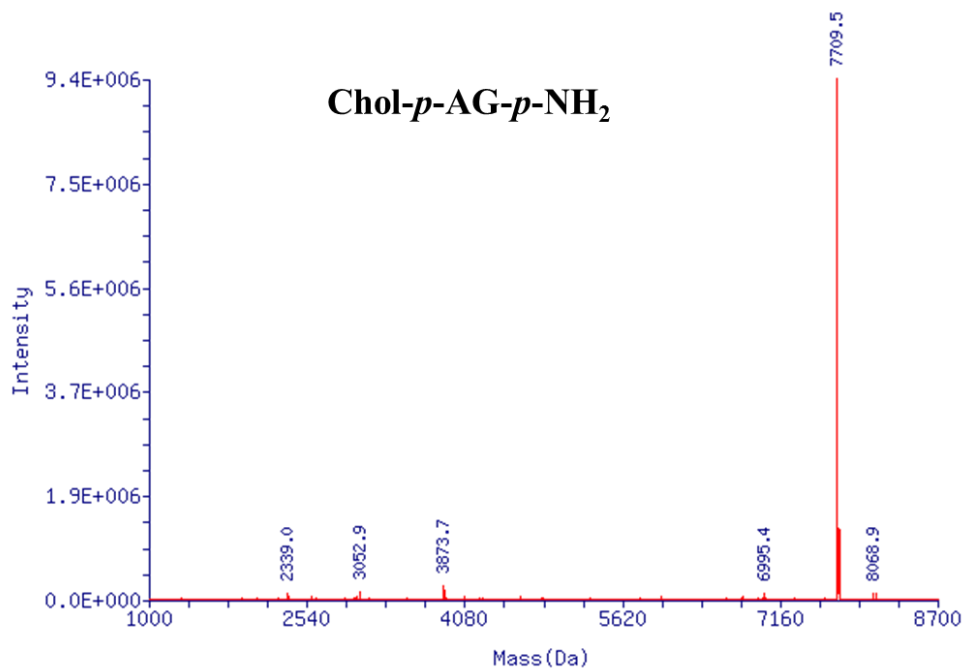

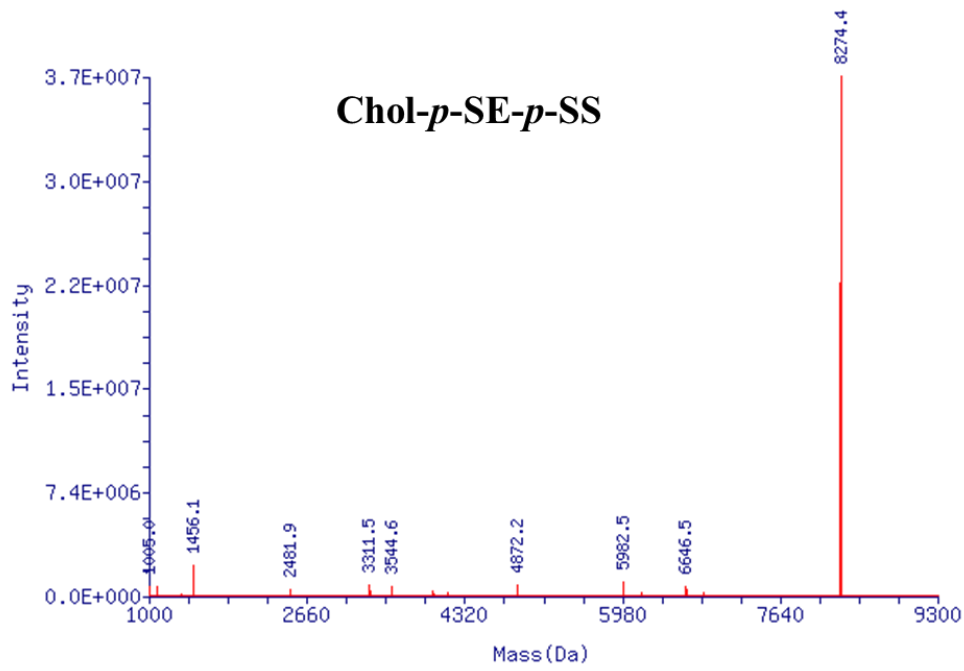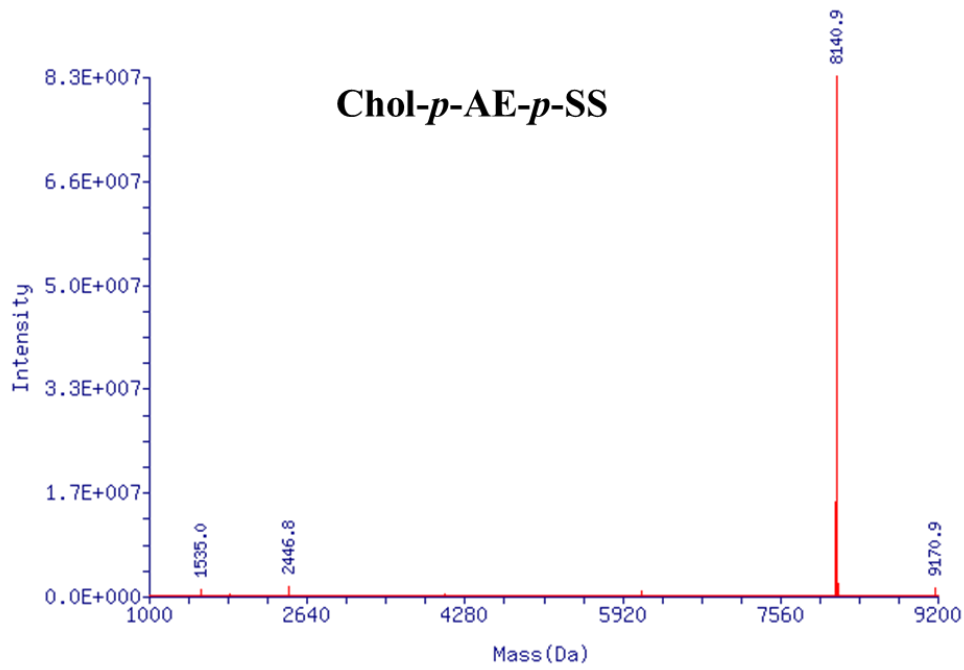

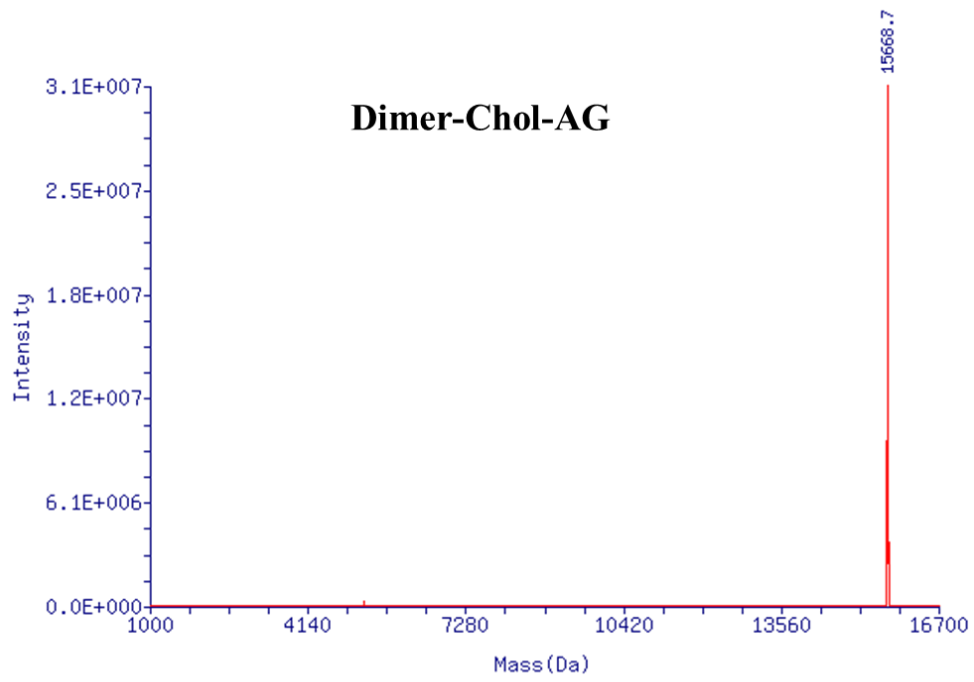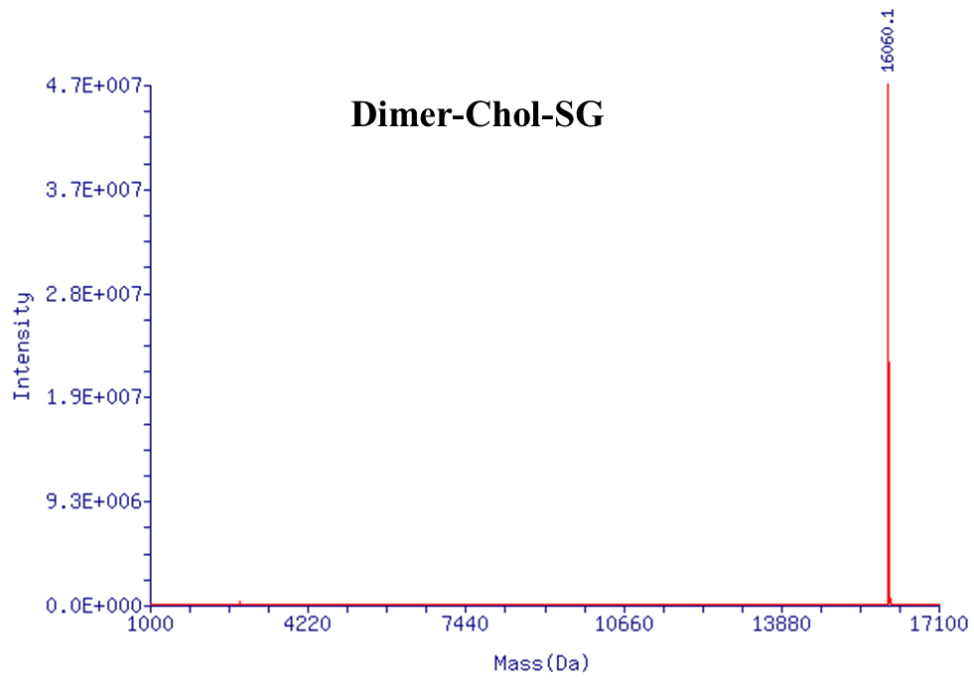

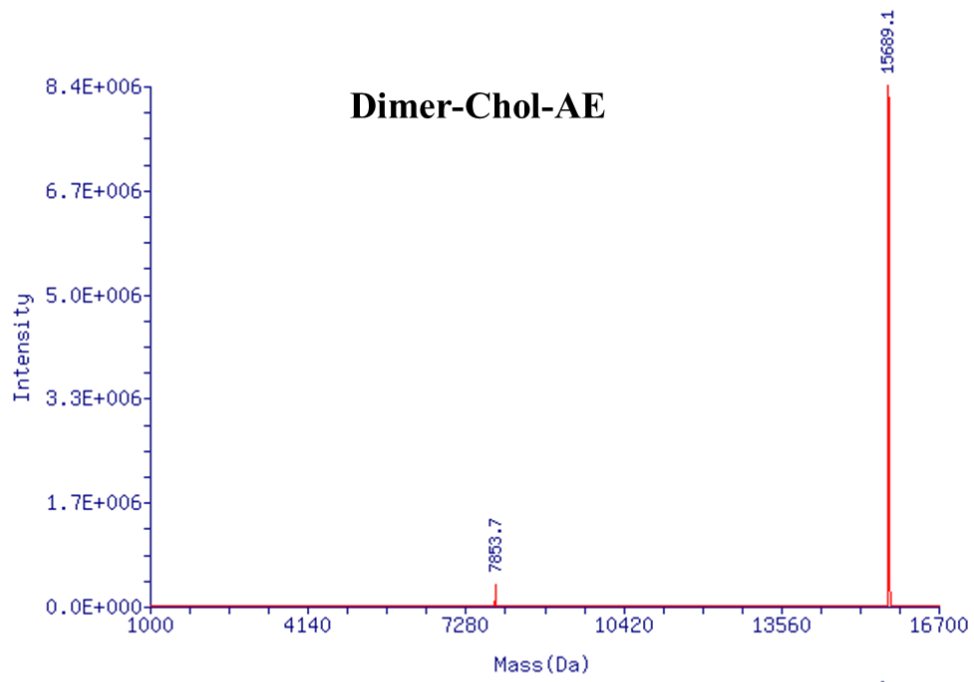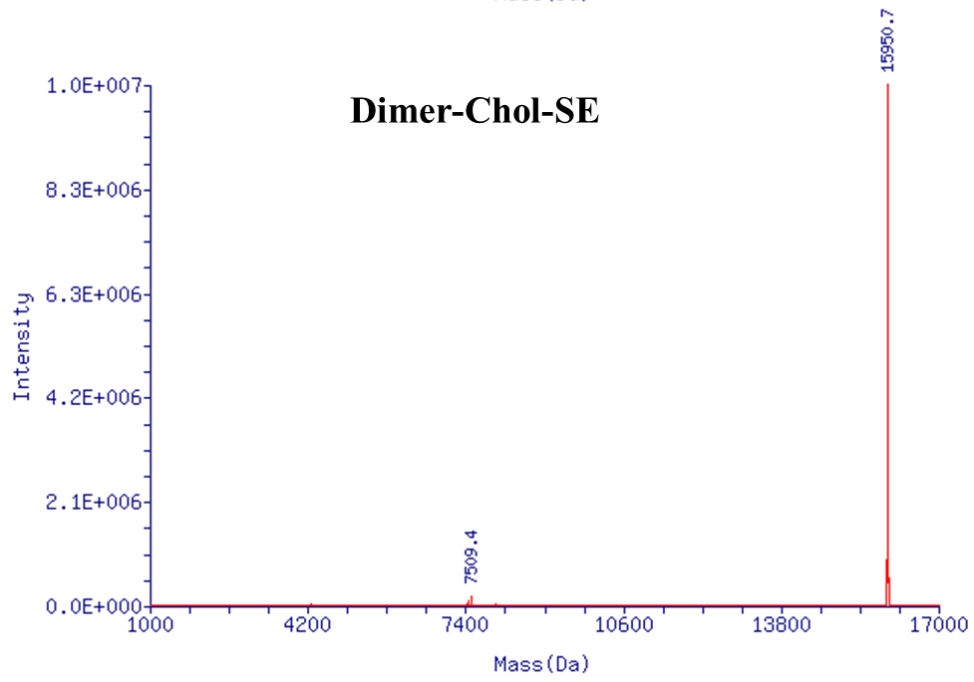



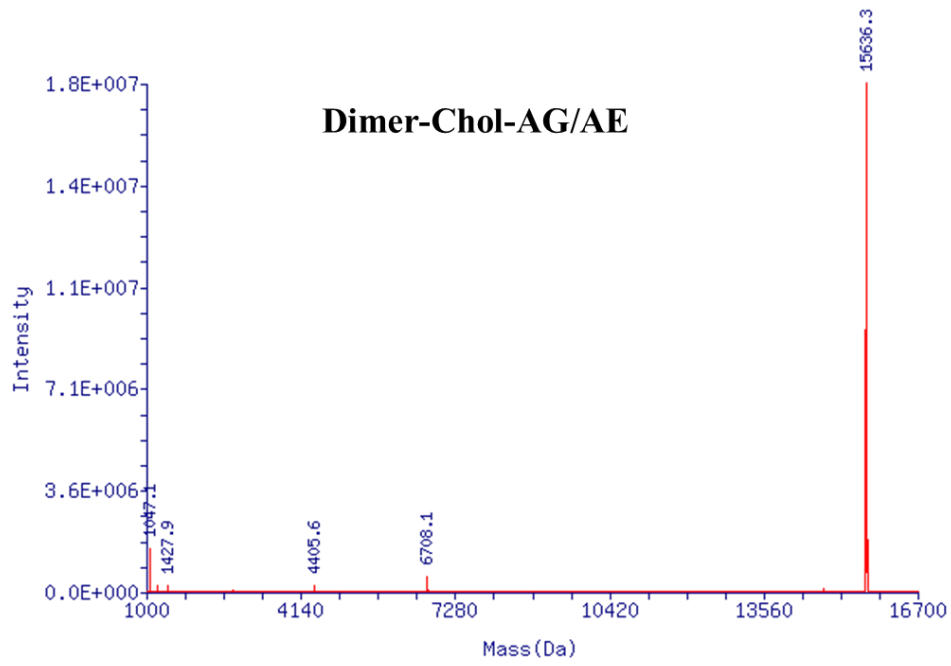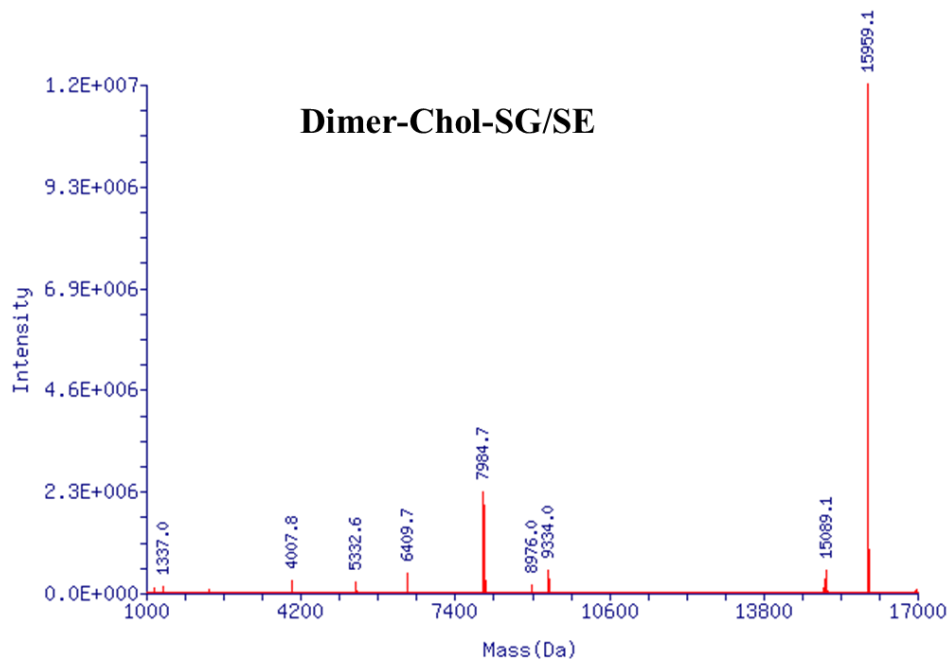

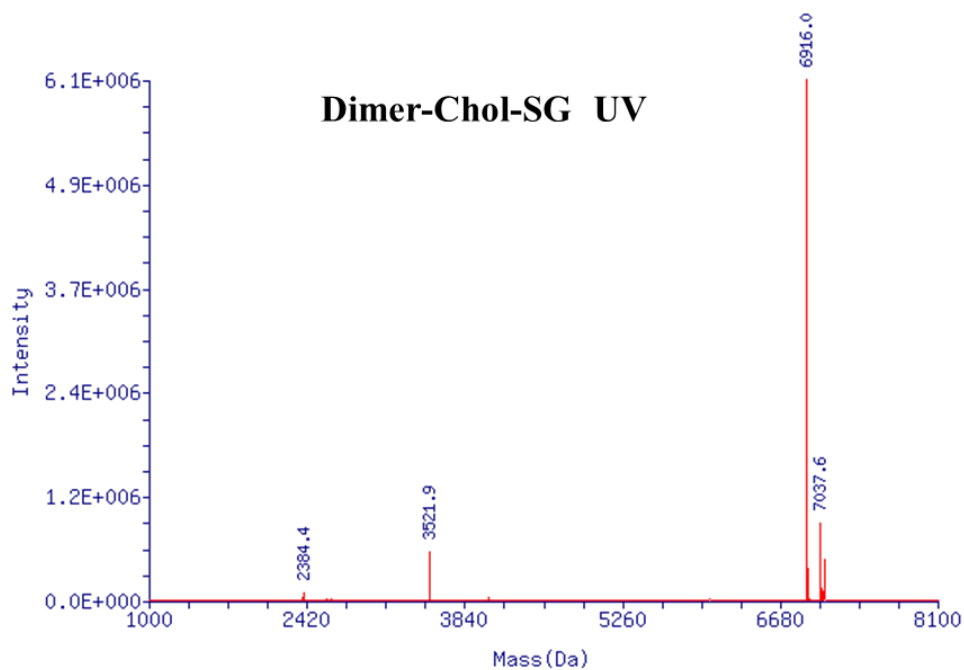

#### REFERENCE

1. Yang, J., Chen, C. and Tang, X. (2018) Cholesterol-Modified Caged siRNAs for Photoregulating Exogenous and Endogenous Gene Expression. *Bioconjug Chem*, **29**, 1010-1015.
